# Supplementary material for: Bisphenol A promotes stress granule assembly and modulates the integrated stress response
Source: PubMed Central journal article supplement (PMC7823164; doi:10.1242/bio.057539), 2021-01-11
Supplement: biolopen-10-057539-s1.pdf [file biolopen-10-057539-s1.pdf]

Figure S1

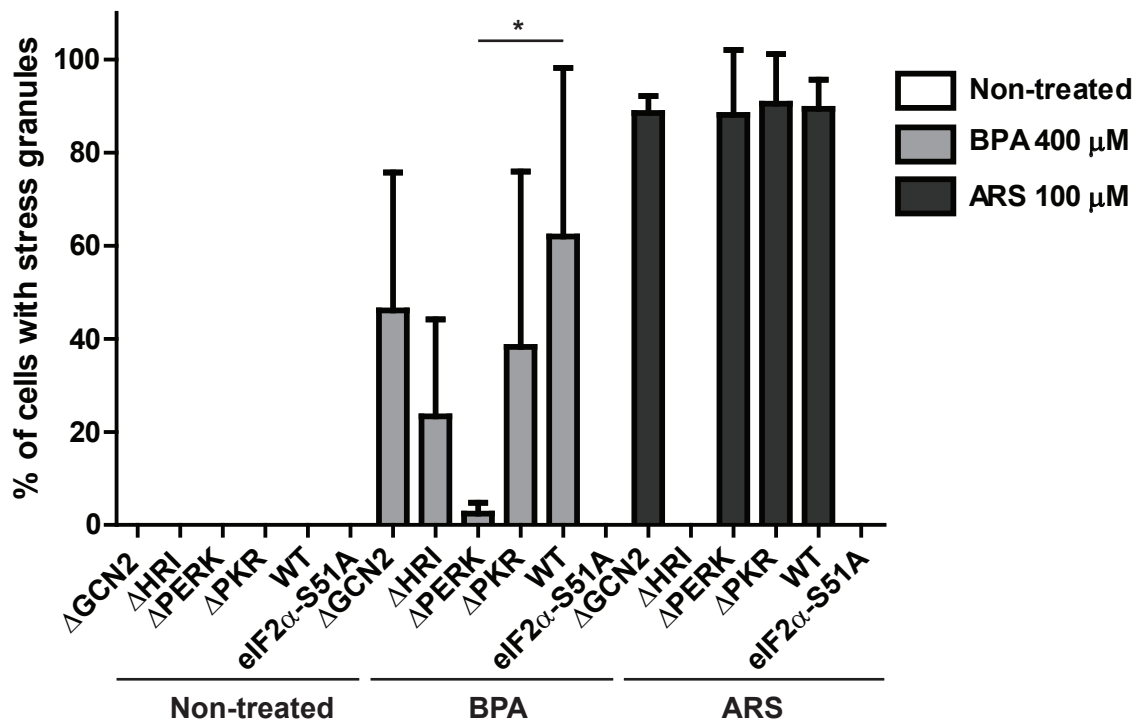

**Figure S1: PERK activation is required for the SG response to BPA**

Quantification of SGs detected by immunofluorescence in Hap1 cells that were genetically modified with CRISPR to knockout GCN2, HRI, PERK, PKR, or to contain the point mutation eIF2α-S51A. Cells were treated with BPA or ARS for 1 hour, or left untreated. Graph represent means with standard deviation, n=3, \* indicates p<0.05.

## Figure S2

A

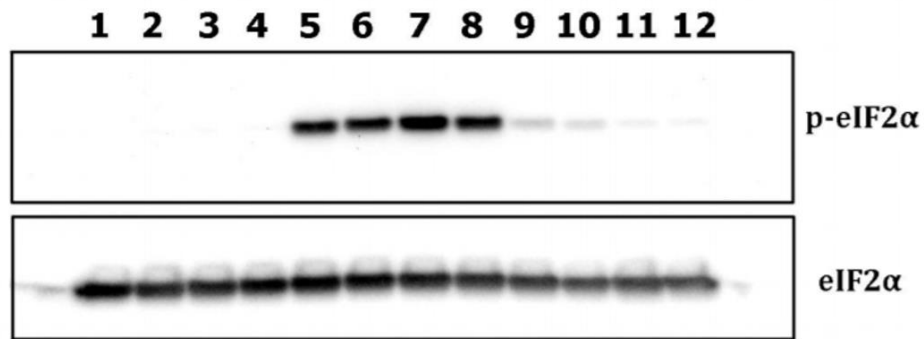

B

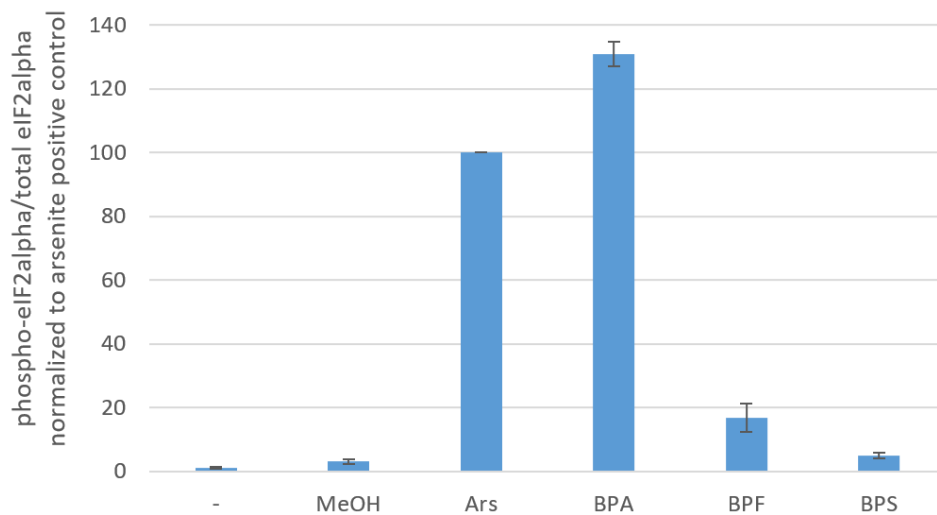

### Figure S2: Western blot analysis of bisphenol treated cells.

A) U2OS extracts blotted for phosphorylated eIF2 $\alpha$  (top) and total eIF2 $\alpha$  (bottom). Lanes: untreated (1 and 2), methanol vehicle (3 and 4), 500  $\mu$ M arsenite (5 and 6), 500  $\mu$ M BPA (7 and 8), 500  $\mu$ M BPF (9 and 10), and 500  $\mu$ M BPS (11 and 12).

B) Quantification of western blot results. Error bars are +/- S.E.M., n=3.

**Figure S3**

**A**

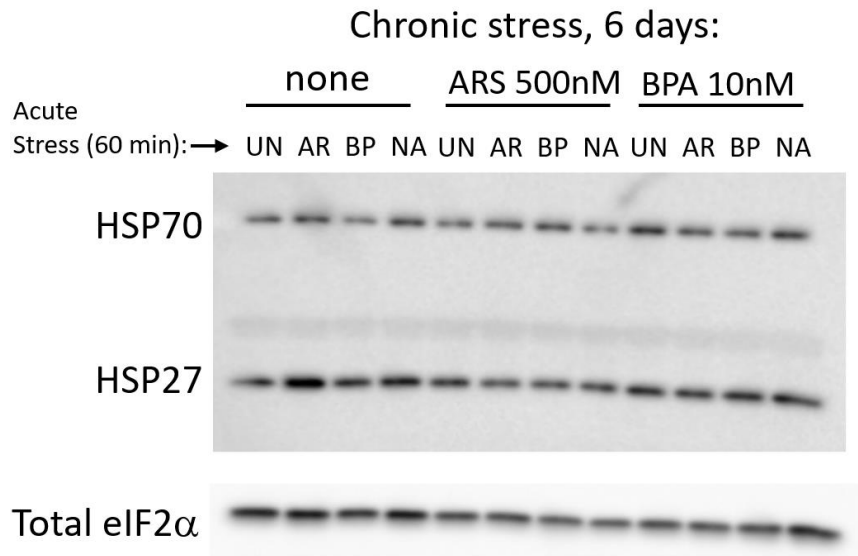

**B**

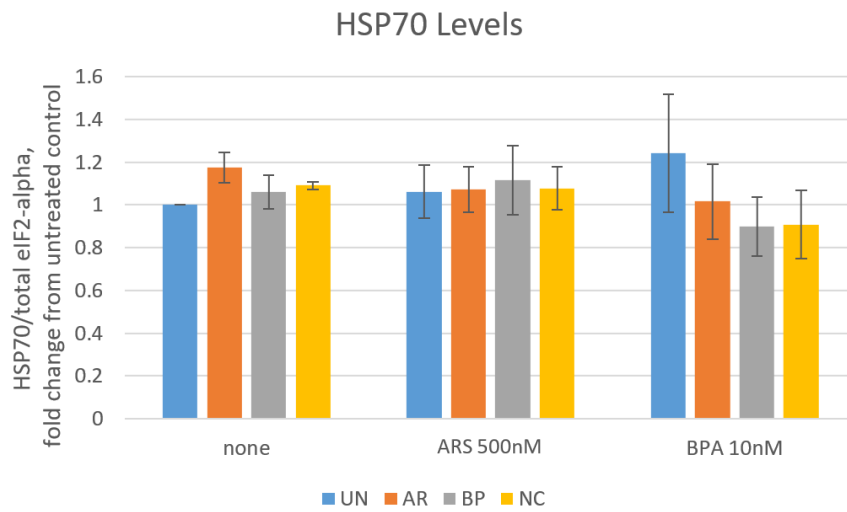

**C**

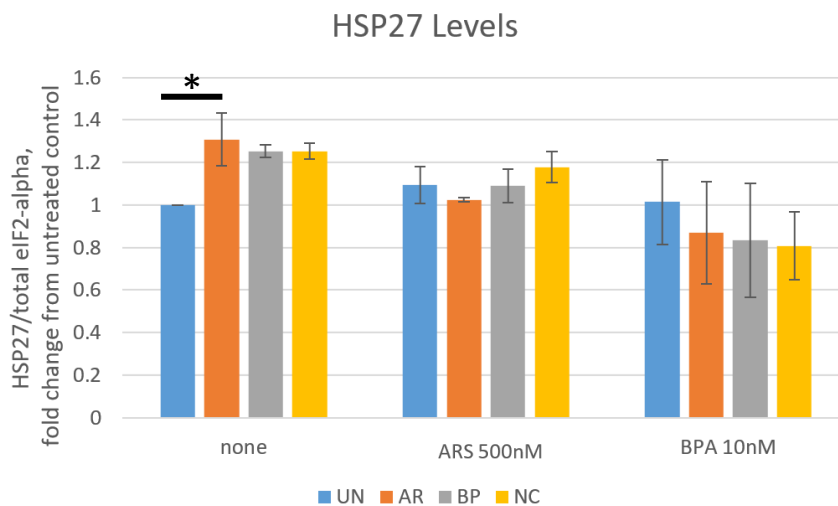

**Figure S3: Heat shock protein levels in response to acute and chronic stress.** A) Western blotting of U2OS cells treated with chronic stress for 6 days (none, 500nM arsenite, 10nM BPA), followed by acute stress treatments with 100  $\mu$ M arsenite (AR, orange bars), 400  $\mu$ M BPA (BP, grey bars) or 0.2M sodium chloride (NA, yellow bars), or untreated (UN, blue bars), with antibodies to HSP70, HSP27, and total eIF2 $\alpha$ . B-C) Quantification of the HSP70 (B) and HSP27 (C) blots relative to total eIF2 $\alpha$ . n=3, error bars are +/- S.E.M. \* p<0.05 by one-way ANOVA within chronic treatment groups and Tukey HSD test.

**Figure S4**

**A**

Chronic stress, 7 days:

Acute  
Stress (60 min): →                                   
                                  none      ARS 500nM    BPA 10nM  
                                  UN AR BP NA UN AR BP NA UN AR BP NA

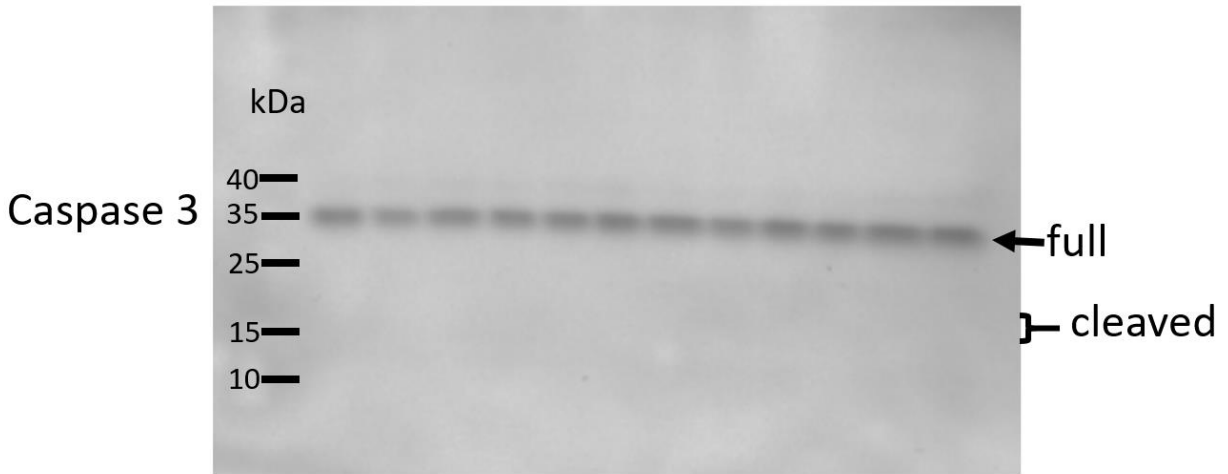

**B**

Acute Treatment (60 minutes):

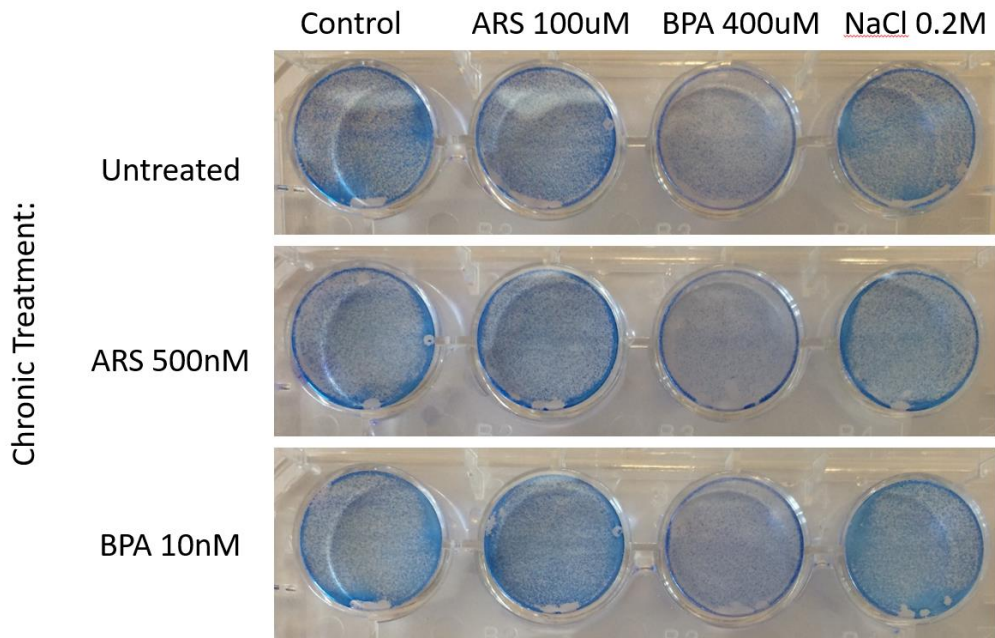

**Figure S4: Chronic stress does not cause apoptotic cell death or significant growth suppression.** A) U2OS cells treated as in Figure 7 and Figure S3 were permitted to recover under chronic stress conditions for 20-22 hours after the acute treatment on day 6, and then were harvested on day 7 for western blotting using an antibody that detects both full-length and cleaved Caspase 3. B) Cells treated as described in A were fixed and stained with Coomassie to visualize cell density. Images shown are representative of three experimental replicates.
